# Supplementary material for: Systematic review of process evaluations of interventions in trials investigating sedentary behaviour in adults
Source: PubMed Central journal article supplement (PMC8804646; doi:10.1136/bmjopen-2021-053945), 2022-01-25
Supplement: bmjopen-2021-053945supp007.pdf [file bmjopen-2021-053945supp007.pdf]

## Supplementary file 7\_SB results from RCTs associated with included PEs\_27.05.21

| Study (Year)<br>Number of participants randomised      | Unit of outcome                                                                           | Outcome measure(s) for SB   | Intervention group Baseline                                                                                                                                                                                                                | Control group Baseline                                                                                                                                                                                                                    | Intervention group End of intervention <sup>a</sup>                                                                                                                                                                                                       | Control group End of intervention <sup>a</sup>                                                                                                                                 |
|--------------------------------------------------------|-------------------------------------------------------------------------------------------|-----------------------------|--------------------------------------------------------------------------------------------------------------------------------------------------------------------------------------------------------------------------------------------|-------------------------------------------------------------------------------------------------------------------------------------------------------------------------------------------------------------------------------------------|-----------------------------------------------------------------------------------------------------------------------------------------------------------------------------------------------------------------------------------------------------------|--------------------------------------------------------------------------------------------------------------------------------------------------------------------------------|
| <b>Adams (2012)</b><br>I: 47 C: 28                     | 1. Mean % of SB time per day (SD)<br>2. Mean sitting hours per week (SD)                  | 1. Accelerometer<br>2. IPAQ | (n= 40)<br>SB: 47.42% (10.77)<br><br>Sitting time: 57.99 (29.70)                                                                                                                                                                           | (n= 24)<br>SB: 50.7% (13.78)<br><br>Sitting time: 45.18 (34.88)                                                                                                                                                                           | (n= 40)<br>SB: 49.16% (10.23)<br><br>Sitting time: 46.00 (28.91)                                                                                                                                                                                          | (n= 24)<br>SB: 50.39% (14.92)<br><br>Sitting time: 40.33 (40.68)                                                                                                               |
| <b>Albright (2015)</b><br>I: 138 C:140                 | Mean sitting hours per day (SD)                                                           | Active Australia Survey     | Traveling to/from work: 1.19 (0.71)*<br>While at work: 2.02 (2.18)<br>Watching TV: 2.05 (1.33)<br>Using a computer at home: 1.27 (0.98)<br>Other leisure time (movies, dining out): 1.38 (1.01)<br>While holding/feeding baby: 2.93 (1.78) | Traveling to/from work: 1.41 (0.82)*<br>While at work: 2.52 (2.5)<br>Watching TV: 1.91 (1.36)<br>Using a computer at home: 1.41 (1.18)<br>Other leisure time (movies, dining out): 1.31 (1.05)<br>While holding/feeding baby: 3.20 (2.08) | Not published                                                                                                                                                                                                                                             | Not published                                                                                                                                                                  |
| <b>Benedetti (2020)</b><br>BCG: 36<br>TEG: 52<br>C: 26 | Baseline: Mean SB minutes per week (SD)<br><br>End of trial: Mean SB minutes per day (SE) | Accelerometer               | BCG: 498.5 (113.6)<br>TEG: 529.8 (107.3)                                                                                                                                                                                                   | 522.8 (86.7)                                                                                                                                                                                                                              | Change between baseline and end of intervention (3 months):<br>BCG: -14.3 (56.3) <sup>c</sup><br>TEG: -4.1 (62.2) <sup>c</sup><br>Change between baseline and end of trial (12 months):<br>BCG: -10.9 (59.9) <sup>c</sup><br>TEG: 4.2 (78.6) <sup>c</sup> | Change between baseline and end of intervention (3 months):<br>-25.6 (77.9) <sup>c</sup><br>Change between baseline and end of trial (12 months):<br>-26.7 (68.3) <sup>c</sup> |
| <b>Berendsen (2015)</b><br>I: 247 C: 164               | Not published                                                                             | Accelerometer               | Not published                                                                                                                                                                                                                              | Not published                                                                                                                                                                                                                             | Not published                                                                                                                                                                                                                                             | Not published                                                                                                                                                                  |

## Supplementary file 7\_SB results from RCTs associated with included PEs\_27.05.21

|                                                             |                                         |                                                                 |                                                                                                               |                                                                                                              |                                                                                                                                                                                                                                                                                                                                                                                                                                                   |                                                                                                                                                                                                                                 |
|-------------------------------------------------------------|-----------------------------------------|-----------------------------------------------------------------|---------------------------------------------------------------------------------------------------------------|--------------------------------------------------------------------------------------------------------------|---------------------------------------------------------------------------------------------------------------------------------------------------------------------------------------------------------------------------------------------------------------------------------------------------------------------------------------------------------------------------------------------------------------------------------------------------|---------------------------------------------------------------------------------------------------------------------------------------------------------------------------------------------------------------------------------|
| <b>Biddle (2017)</b><br>I: 94 C:93                          | Mean SB hours per day (95% CI)          | 1. Actigraph (worn on waistband)<br>2. ActivPAL (worn on thigh) | Actigraph (n= 76): 10.83 (10.50, 11.17) <sup>c</sup><br>ActivPal (n= 60): 8.91 (8.59, 9.24) <sup>c</sup>      | Actigraph (n= 80): 11.01 (10.76, 11.26) <sup>c</sup><br>ActivPal (n= 57): 9.02 (8.73, 9.30) <sup>c</sup>     | Outcomes not measured at end of intervention (6 Weeks).<br><i>Change between baseline and end of trial (12 months)</i><br>Actigraph (n= 38): -0.29 (-0.75, 0.17) <sup>c</sup><br>ActivPal (time change, n=32): 0.64 (0.13, 1.16) <sup>c</sup>                                                                                                                                                                                                     | Outcomes not measured at end of intervention (6 Weeks).<br><i>Change between baseline and end of trial (12 months)</i><br>Actigraph n= 49): -0.23 (-0.60, 0.14) <sup>c</sup><br>ActivPal (n=29): 0.58 (0.06, 1.09) <sup>c</sup> |
| <b>Blunt (2018)</b><br>I: 59 C:59                           | Mean sitting minutes per day (SD)       | IPAQ                                                            | 360 (315)                                                                                                     | 360 (240)                                                                                                    | Mean difference between groups (only measured at end of active intervention phase – 6 months): -0.08 (-0.16, -0.006)* <sup>c</sup>                                                                                                                                                                                                                                                                                                                |                                                                                                                                                                                                                                 |
| <b>Eramli (2017)</b><br>I: 39 C: 37                         | Mean SB hours per day (SE)              | 1. ActivPal<br>2. IPAQ                                          | ActivPal SB: 18.0 (0.27) <sup>c</sup><br>IPAQ weekday sitting: 5.3 (0.31)<br>IPAQ weekend sitting: 5.3 (0.36) | ActivPal SB: 18.5 (0.2) <sup>c</sup><br>IPAQ weekday sitting: 4.7 (0.41)<br>IPAQ weekend sitting: 4.6 (0.38) | ActivPal SB: 17.2 (0.3) <sup>c</sup><br>IPAQ weekday sitting: 4.2 (0.33)**<br>IPAQ weekend sitting: 3.9 (0.33)                                                                                                                                                                                                                                                                                                                                    | ActivPal SB: 18.7 (0.41) <sup>c</sup><br>IPAQ weekday sitting: 5.7 (0.53)**<br>IPAQ weekend sitting: 5.1 (0.63)                                                                                                                 |
| <b>Harris (2018)</b><br>Postal: 339<br>Nurse: 346<br>C: 338 | Mean SB minutes per day (SD, or 95% CI) | Accelerometer                                                   | Postal: 614 (71)<br>Nurse: 619 (78)                                                                           | 613 (86)                                                                                                     | Mean difference between groups at end of intervention (3 months)<br>Postal versus control: -2 (-12, 7) <sup>c</sup><br>Nurse versus control: -7 (-16, 3) <sup>c</sup><br>Nurse versus Postal: -4 (-13, 5) <sup>c</sup><br>Mean difference between groups at <i>end of trial (12 months)</i><br>Postal versus control: 1 (-8, 10) <sup>c</sup><br>Nurse versus control: -0.2 (-9, 9) <sup>c</sup><br>Nurse versus Postal: -1 (-10, 8) <sup>c</sup> |                                                                                                                                                                                                                                 |
| <b>Lakerveld (2012)</b><br>I: 314 C: 308                    | Mean SB minutes per day (SD)            | A subscale of AQUAA                                             | 253.7 (146.9) <sup>c</sup>                                                                                    | 255.4 (124.5) <sup>c</sup>                                                                                   | Outcomes not measured at end of intervention<br><i>End of trial (Month 24):</i> 231.5 (122.2) <sup>c</sup>                                                                                                                                                                                                                                                                                                                                        | Outcomes not measured at end of intervention<br><i>End of trial (Month 24):</i> 233.0 (140.7) <sup>c</sup>                                                                                                                      |

## Supplementary file 7\_SB results from RCTs associated with included PEs\_27.05.21

|                                                                                                                     |                                                              |                                                                                                          |                                                                                                                      |                                                                                              |                                                                                                                      |                                                                                              |
|---------------------------------------------------------------------------------------------------------------------|--------------------------------------------------------------|----------------------------------------------------------------------------------------------------------|----------------------------------------------------------------------------------------------------------------------|----------------------------------------------------------------------------------------------|----------------------------------------------------------------------------------------------------------------------|----------------------------------------------------------------------------------------------|
| <b>Lane (2010)</b><br>I: 85 C: 91                                                                                   | Mean sitting time minutes per week (SD)                      | Frequently used validated questions selected for the trial from other population-level PA interventions. | 335.9 (194.9)                                                                                                        | 310.1 (224.7)                                                                                | 371.4 (170.1)                                                                                                        | 369.5 (152.6)                                                                                |
| <b>Matson (2018)</b><br>I: 29 C: 31                                                                                 | Mean sitting time minutes over last 7 days (SD) <sup>b</sup> | ActivPAL                                                                                                 | Not published                                                                                                        | Not published                                                                                | Change between baseline and end of intervention (n= 29): -70.1 (104) <sup>b</sup>                                    | Change between baseline and end of intervention (n= 25): 6.5 (69) <sup>b</sup>               |
| <b>Matthews (2016)</b><br>I: 54 C: 48                                                                               | Mean% of time per day spent in SB (SD)                       | Accelerometer                                                                                            | 64.2% (10.5)                                                                                                         | 66.9% (11.3)                                                                                 | (n= 42)<br>66.4% (10.0) <sup>c</sup>                                                                                 | (n= 40)<br>65.9% (12.0) <sup>c</sup>                                                         |
| <b>Poston (2013)</b><br>I: 94 C: 89                                                                                 | Mean SB time minutes per day (SD)                            | 1. Accelerometer<br>2. RPAQ                                                                              | Accelerometer (n= 68):<br>1165 (91) <sup>c</sup><br>RPAQ (n= 79):<br>1009 (187) <sup>c</sup>                         | Accelerometer (n= 72):<br>1172 (95) <sup>c</sup><br>RPAQ (n= 80):<br>1007 (207) <sup>c</sup> | Accelerometer (n= 36):<br>1197 (77) <sup>c</sup><br>RPAQ (n= 56):<br>1020 (226) <sup>c</sup>                         | Accelerometer (n= 39):<br>1175 (86) <sup>c</sup><br>RPAQ (n= 54):<br>1068 (177) <sup>c</sup> |
| <b>School of Public Health HKU (2017)</b><br>I: 357 C:316                                                           | Mean sitting hours in a working day (SD)                     | IPAQ-C                                                                                                   | 4.47 (2.47)*                                                                                                         | 4.11 (2.38)*                                                                                 | 4.3                                                                                                                  | 4.2                                                                                          |
| <b>Spittaels (2007)</b><br>I:<br>Group 1 (tailored advice + email): 116<br>Group 2 (tailored advice): 122<br>C: 141 | Mean sitting minutes per day (SD)                            | IPAQ                                                                                                     | Group 1:<br>Weekday: 482 (183)<br>Weekend day: 308 (160)<br>Group 2:<br>Weekday: 492 (202)<br>Weekend day: 296 (160) | Weekday: 470 (217)<br>Weekend day: 309 (182)                                                 | Group 1:<br>Weekday: 443 (168)<br>Weekend day: 276 (131)<br>Group 2:<br>Weekday: 438 (172)<br>Weekend day: 268 (141) | Weekday: 419 (181)<br>Weekend day: 271 (139)                                                 |
| <b>Stathi (2019)</b><br>I: 22 C: 17                                                                                 | Mean SB minutes per day (SD, +/- 95% CI)                     | Accelerometer                                                                                            | 681.5 (74.9)                                                                                                         | 616.2 (112.3)                                                                                | Change between baseline and end of intervention:                                                                     | Change between baseline and end of intervention:                                             |

## Supplementary file 7\_SB results from RCTs associated with included PEs\_27.05.21

|                                       |                              |               |             |              |                                                                                                             |                                                                                                              |
|---------------------------------------|------------------------------|---------------|-------------|--------------|-------------------------------------------------------------------------------------------------------------|--------------------------------------------------------------------------------------------------------------|
|                                       |                              |               |             |              | 13.1 (77.2) (-26.6, 52.8)                                                                                   | -8.7 (70.7) (-57.6, 75.1)                                                                                    |
| <b>Williams (2019)</b><br>I: 20 C: 20 | Mean SB minutes per day (SE) | Accelerometer | 577.2 (9.8) | 549.2 (19.1) | End of intervention (17 weeks, n= 16): 520.9 (36.2)*<br><i>End of trial (6 months, n= 8): 508.2 (19.4)*</i> | End of intervention (17 weeks, n= 17): 637.9 (30.4)*<br><i>End of trial (6 months, n= 13): 661.2 (33.5)*</i> |

**Supplementary file 3: Sedentary behaviour measured (at baseline and end of the trial) in the randomised controlled trials associated with the included process evaluation studies**

**Keys:** <sup>a</sup> = Results available from the assessment immediately after the intervention, unless otherwise specified; <sup>b</sup> = unclear if adjusted for covariates; <sup>c</sup> = data were adjusted for covariates; \* = p value <0.05 for comparison between intervention and control groups (where reported); \*\* = p value <0.025 for comparison between intervention and control groups reported as accepted statistical significance ; *Italic font* = End of trial results, if available from publications; AQuAA = Activity Questionnaire for Adolescents & Adults; BCG = Behaviour Change Group; C = Control group; FU = Follow-up; I = Intervention group; IPAQ = International Physical Activity Questionnaire; IPAQ-C = International Physical Activities Questionnaire-Chinese version; n = number of persons included in the analysis; RPAQ = Recent Physical Activity Questionnaire; SB = Sedentary behaviour; SD = Standard deviation; SE = Standard error; TEG = Traditional Exercise Group
