# Supplementary material for: Systematic review of process evaluations of interventions in trials investigating sedentary behaviour in adults
Source: PubMed Central journal article supplement (PMC8804646; doi:10.1136/bmjopen-2021-053945), 2022-01-25
Supplement: bmjopen-2021-053945supp008.pdf [file bmjopen-2021-053945supp008.pdf]

**Supplementary file 8 characteristics of 24 excluded studies 27.05.21**

| <b>Study</b>           | <b>Reason for exclusion</b>                                                                                                                                                                              |
|------------------------|----------------------------------------------------------------------------------------------------------------------------------------------------------------------------------------------------------|
| Ashe 2013              | Results of process evaluation not available.                                                                                                                                                             |
| Burton 1995            | Ineligible study design: The study did not involve process evaluation.                                                                                                                                   |
| Cohen 2017             | Ineligible study design: The participants were not all assessed at all timepoints throughout the trial. The data from each time point were not obtained from the same sample group throughout the study. |
| Coll-Planas 2019       | Results of process evaluation not available.                                                                                                                                                             |
| Douglas 2019           | Ineligible study design: The study is not RCT.                                                                                                                                                           |
| Gray 2018              | Sedentary behaviour was not measured in the RCT.                                                                                                                                                         |
| Gummelt 2017           | Sedentary behaviour was not measured in the RCT.                                                                                                                                                         |
| Hammerback 2012        | Sedentary behaviour was not measured in the RCT.                                                                                                                                                         |
| Harvey 2016            | Ineligible study design: The study did not involve process evaluation of exploration of the intervention.                                                                                                |
| Holt 2019              | Sedentary behaviour was not measured in the RCT.                                                                                                                                                         |
| Hsu 2013               | Sedentary behaviour was not measured in the RCT.                                                                                                                                                         |
| Jayaprakash 2016       | Sedentary behaviour was not measured in the RCT: Sedentary behaviour was measured at baseline, but not throughout the trial as an outcome.                                                               |
| Lai 2019               | Ineligible study design: The study was not a RCT.                                                                                                                                                        |
| Maddison 2020          | Sedentary behaviour was not measured in the RCT.                                                                                                                                                         |
| McAuley 2013           | Ineligible study design: The study did not involve process evaluation.                                                                                                                                   |
| Orme 2017              | Ineligible study design: The evaluation of feasibility did not involve process evaluation or qualitative evaluation.                                                                                     |
| Rovniak 2014           | Sedentary behaviour was not measured in the RCT.                                                                                                                                                         |
| Sazlina 2015           | Results of process evaluation not available.                                                                                                                                                             |
| Seguin 2019            | Sedentary behaviour was not measured in the RCT.                                                                                                                                                         |
| Sheppard 2016          | Sedentary behaviour was not measured in the RCT.                                                                                                                                                         |
| Stevens 2015           | Sedentary behaviour was not measured in the RCT.                                                                                                                                                         |
| Thomsen 2016           | Ineligible study design: The study did not involve process evaluation or qualitative evaluation.                                                                                                         |
| Thompson 2008          | Results of process evaluation not available.                                                                                                                                                             |
| Thornton 2018          | Ineligible comparator: The eligible intervention was assigned to the control group, not the experimental intervention group in this study.                                                               |
| Tiedemann 2015         | Sedentary behaviour was not measured in the RCT.                                                                                                                                                         |
| van de Glind 2017      | Results of process evaluation not available.                                                                                                                                                             |
| van der Wardt 2019     | Sedentary behaviour was not measured in the RCT.                                                                                                                                                         |
| Varela-Mato 2016       | Ineligible setting: The intervention was delivered at workplace.                                                                                                                                         |
| Voorn 2016             | Sedentary behaviour was not measured in the RCT.                                                                                                                                                         |
| Yeung 2020             | Ongoing: Study not completed.                                                                                                                                                                            |
| Zabaleta-Del-Olmo 2018 | Results of process evaluation not available.                                                                                                                                                             |

**Keys:** RCT = Randomised Controlled Trial
