# Supplementary material for: Systematic review of process evaluations of interventions in trials investigating sedentary behaviour in adults
Source: BMJ Open. 2022 Jan 25;12(1):e053945. doi: 10.1136/bmjopen-2021-053945 (PMC8804646; doi:10.1136/bmjopen-2021-053945)
Supplement: Supplementary data [file bmjopen-2021-053945supp006.pdf]

## Supplementary file 6. Implementation data\_27.05.21

| Study (Year)           | Fidelity (delivering the intervention as per protocol)                                                                                                                                                                                                                                                                                                                                                                                          | Recruitment (recruiting participants and sites)                                                                                                                                                                                       | Retention (participants remaining in the intervention or control/usual care group)                                                                                                                                                                                                  | Reach (dose received and participant engagement)                                                                                                                                                                                                                                                                                                                                                                                                                                                                                                                   |
|------------------------|-------------------------------------------------------------------------------------------------------------------------------------------------------------------------------------------------------------------------------------------------------------------------------------------------------------------------------------------------------------------------------------------------------------------------------------------------|---------------------------------------------------------------------------------------------------------------------------------------------------------------------------------------------------------------------------------------|-------------------------------------------------------------------------------------------------------------------------------------------------------------------------------------------------------------------------------------------------------------------------------------|--------------------------------------------------------------------------------------------------------------------------------------------------------------------------------------------------------------------------------------------------------------------------------------------------------------------------------------------------------------------------------------------------------------------------------------------------------------------------------------------------------------------------------------------------------------------|
| <b>Adams (2012)</b>    | Only qualitative data reported.                                                                                                                                                                                                                                                                                                                                                                                                                 | 10 clusters invited.<br>7 clusters recruited (needed active membership $n \geq 12$ ).                                                                                                                                                 | I: $n = 40$ (85.1%)<br>C: $n = 24$ (85.7%)<br><br>Primary reasons for leaving the study:<br>55% (6/11) Having to wear the activity monitors.<br>18% (2/11) Time commitment too great.<br>18% (2/11) Had not understood length of study.<br>9% (1/11) Went out of town unexpectedly. | 23/40 (58%) participants always used 2 of 3 intervention elements<br><br>Overall satisfaction with the programme (Likert scale, 1= not at all, 5= very satisfied):<br>39.5% (17/43) participants rated very satisfied (highest %).<br>97.7% (42/43) participants rated at least "3= somewhat" or above.                                                                                                                                                                                                                                                            |
| <b>Albright (2015)</b> | 5% (80/1586) recorded telephone counselling sessions evaluated against a checklist of the essential intervention components:<br><br>88% fidelity over the 12-month intervention to the essential intervention components.<br><br>96% calls covered barriers to MVPA discussion.<br>97% calls covered assessing participant's previous MVPA goal.<br>100% calls covered setting the participant's next MVPA goal.<br><br>The two components most | Community recruitment:<br>272 via adverts, e.g., magazines, radio stations;<br>170 randomised,<br><br>Kaiser Permanente recruitment:<br>3844 Postcards sent out;<br>1176 calls made;<br>419 interested in joining;<br>141 randomised. | I: $n = 115$ (74.7%)<br>C: $n = 127$ (80.9%)<br><br>Most frequent reasons for failure to complete the intervention:<br>13% Pregnancy.<br>9.5% Too busy.<br>6.1% Discontinued participation, no given reason.<br>3.5% Family/job issues.                                             | TTCW group:<br>90.4% of the participants receiving $\geq 13$ of the 17 scheduled calls.<br><br>78.3% of the participants viewed the website at least once.<br><br>75% of participants set incremental MVPA goals with a health educator during the counselling sessions over the 12-month intervention period.<br><br>Level of achieving set MVPA goals in the 3 phases among all participants:<br><br>High level ( $\geq 100\%$ of MVPA goal achieved or exceeded):<br>40.6% of the time during Phase 1 (weekly calls).<br>39.9% of time during Phase 2 (biweekly |

## Supplementary file 6. Implementation data\_27.05.21

|                          |                                                                                                                                                                                                                 |                                                                                                                                                                                                                                                                                                                                                                                 |                                                                                                                                                                                                                                                                |                                                                                                                                                                                                                                                                                                                                                                                        |
|--------------------------|-----------------------------------------------------------------------------------------------------------------------------------------------------------------------------------------------------------------|---------------------------------------------------------------------------------------------------------------------------------------------------------------------------------------------------------------------------------------------------------------------------------------------------------------------------------------------------------------------------------|----------------------------------------------------------------------------------------------------------------------------------------------------------------------------------------------------------------------------------------------------------------|----------------------------------------------------------------------------------------------------------------------------------------------------------------------------------------------------------------------------------------------------------------------------------------------------------------------------------------------------------------------------------------|
|                          | frequently not delivered:<br>Pedometer steps (asked in 68.8% calls).<br>MVPA resources (offered in 80% calls).                                                                                                  |                                                                                                                                                                                                                                                                                                                                                                                 |                                                                                                                                                                                                                                                                | calls).<br>42.0% of time during Phase 3 (monthly calls).<br><br>Moderate level (50-99% MVPA goal achieved):<br>23.5% of the time during Phase 1.<br>28.4% of the time during Phase 2.<br>21.1% of the time during Phase 3.<br><br>Low level (0-49% MVPA goal achieved):<br>35.8% of the time during Phase 1.<br>31.7% of the time during Phase 2.<br>36.9% of the time during Phase 3. |
| <b>Benedetti (2020)</b>  | Checklist to assess implementation, including programme fidelity, instructor knowledge, classroom, schedule, participants' attention and attendance:<br>All analysed items achieved an average of 98% fidelity. | 2 of 5 health districts in Florianopolis were interested in participating, consisting 20 of 50 HCs.<br>6 HCs were interested, and had the physical structure and human resources to offer the programmes, thus were recruited.<br><br>4,071 older adults across the 6 HCs; 24.2% (985) individuals were considered eligible;<br>11.5% (114) of eligible participants recruited. | Post-intervention (3 months):<br>BCG: n= 18 (50%)<br>TEG: n= 33 (63.5%)<br>C: n= 23 (88.5%)<br><br>6 months:<br>BCG: n= 17 (47.2%)<br>TEG: n= 32 (61.5%)<br>C: n= 21 (80.8%)<br><br>12 months:<br>BCG: n= 13 (36.1%)<br>TEG: n= 28 (53.8%)<br>C: n= 17 (65.4%) | Overall, 49% of participants attended at least 75% of all sessions, with disengagement occurring mostly in the first three weeks of the study (42%).<br><br>Both intervention groups showed relatively high disengagement rates (BCG 50% vs. TEG 37%) with individuals in the BCG presenting lower rates of overall attendance (27% vs. 47%).                                          |
| <b>Berendse n (2015)</b> | Fidelity:<br>24/25 interviewed HCPs were trained in Motivational Interviewing, and applied MI with the participants.<br><br>100% PTs made an exercise plan with the participants.                               | 30 clusters invited.<br><br>411 participants recruited (with 2 to 30 subjects per cluster, 76.9% of participants referred by the GP).<br><br>Eligibility based on baseline data:<br>- 48.9% met the inclusion criteria.<br>- 10.0% healthy BMI/no comorbidities.                                                                                                                | 28 clusters remained<br><br>Participants:<br>I: n= 196 (79.4%)<br>C: n= 126 (76.8%)<br><br>From recorded data, the main reasons of drop-outs were health issues (31.5%),                                                                                       | <b>% = median of attended / planned number of meetings:</b><br><br>LSA meetings:<br>I: 50.0%; C: 66.7%<br>PT group meetings:<br>I: 47.1% to 61.5%; C: 0% (planned n= 0)<br>PT individual meetings:<br>I: 0% (planned 6 to 7); C: 33.3%                                                                                                                                                 |

## Supplementary file 6. Implementation data\_27.05.21

|                                                                                                                                                                                                                                                                                                                                                                                                                                                                                                                                                                                                                                                                                                                                                                                                                                                                                     |                                                                                                                                      |                                      |                                                                                                                                                                                                                                                                                                                      |
|-------------------------------------------------------------------------------------------------------------------------------------------------------------------------------------------------------------------------------------------------------------------------------------------------------------------------------------------------------------------------------------------------------------------------------------------------------------------------------------------------------------------------------------------------------------------------------------------------------------------------------------------------------------------------------------------------------------------------------------------------------------------------------------------------------------------------------------------------------------------------------------|--------------------------------------------------------------------------------------------------------------------------------------|--------------------------------------|----------------------------------------------------------------------------------------------------------------------------------------------------------------------------------------------------------------------------------------------------------------------------------------------------------------------|
| <p>84.8% of the participants set exercise goals or made an exercise plan with an HCP. 79.9% Exercise plans or goals were made with PT, if participants attended any individual meeting with a PT.</p> <p>5/6 dietitians made nutritional plans with the participants. 73.9% of the participants made set nutritional plan or goals with an HCP. 91.7% of the plans or goals were made with the dietitian, if participants attended any individual meeting with a dietitian.</p> <p>96.9% participants reported LSA had explained the intervention clearly at the beginning.</p> <p>226 participants (from both IG and CG) completed a questionnaire after 12 months:<br/>40.7% Reported the LSA had explicitly concluded the intervention.<br/>41.2% Reported the intervention was not concluded.<br/>18.1% Did not know.</p> <p>Dose Delivered:<br/>1 PT in start-up programme</p> | <p>- 16.8% higher weight-related risk than the target population.<br/>- 24.3% of participants' eligibility could not be checked.</p> | <p>and personal reasons (10.1%).</p> | <p>Dietitian group meetings:<br/>I: 42.9%; C: 28.6%<br/>Dietitian individual meetings:<br/>I: 33.3%; C: 133.3%</p> <p>Satisfaction (on scale of 1–10, 10 is best):<br/>Mean range (across meeting types):<br/>I: 7.1 – 8.0<br/>C: 7.1 – 7.3<br/>Overall programme (Mean (SD)):<br/>I: 7.7 (1.5)<br/>C: 7.1 (1.8)</p> |
|-------------------------------------------------------------------------------------------------------------------------------------------------------------------------------------------------------------------------------------------------------------------------------------------------------------------------------------------------------------------------------------------------------------------------------------------------------------------------------------------------------------------------------------------------------------------------------------------------------------------------------------------------------------------------------------------------------------------------------------------------------------------------------------------------------------------------------------------------------------------------------------|--------------------------------------------------------------------------------------------------------------------------------------|--------------------------------------|----------------------------------------------------------------------------------------------------------------------------------------------------------------------------------------------------------------------------------------------------------------------------------------------------------------------|

## Supplementary file 6. Implementation data\_27.05.21

|                      |                                                                                                                                                                                                                                                                                                          |              |                                                                                                                                                                                                                                                                                                                       |                                                                                                                                                                                                                                                                                                                                                                                                                                                                                                                                                                                                                                                                                                                                                                |
|----------------------|----------------------------------------------------------------------------------------------------------------------------------------------------------------------------------------------------------------------------------------------------------------------------------------------------------|--------------|-----------------------------------------------------------------------------------------------------------------------------------------------------------------------------------------------------------------------------------------------------------------------------------------------------------------------|----------------------------------------------------------------------------------------------------------------------------------------------------------------------------------------------------------------------------------------------------------------------------------------------------------------------------------------------------------------------------------------------------------------------------------------------------------------------------------------------------------------------------------------------------------------------------------------------------------------------------------------------------------------------------------------------------------------------------------------------------------------|
|                      | <p>only planned group meetings with all HCPs, instead of the individual meetings intended per protocol.</p> <p>4 dietitians typically offered individual meetings with participants, as per protocol. The other 4 dietitians only planned individual meetings according to participant's preference.</p> |              |                                                                                                                                                                                                                                                                                                                       |                                                                                                                                                                                                                                                                                                                                                                                                                                                                                                                                                                                                                                                                                                                                                                |
| <b>Biddle (2017)</b> | Not reported                                                                                                                                                                                                                                                                                             | Not reported | <p>*I: n= 41 (43.6%)<br/>*C: n= 68 (73.1%)</p> <p>Reasons for failure to complete the intervention or loss to follow-ups:<br/>24.5% (23/94) Did not receive allocated intervention in the intervention group.<br/>16% (30/187) No longer want to participate.<br/>13.4% (25/187) Failed to attend FU appointment.</p> | <p>23/94 (24%) allocated to intervention group did not attend the structured education workshop.<br/>45/94 (47.9%) took part in Week 6 phone progress reviews</p> <p>26/31 (84%) participants used the accelerometer daily initially, but this fell to 13/31 participants at 6 weeks.</p> <p>25/31 (81%) participants felt the accelerometer as helpful at 6 weeks.</p> <p>Workshop feedback:<br/>Behaviour change plans for future (6 weeks):<br/>4/38 (11%) referred to strategies to sit less<br/>17/38 (45%) planned for physical activity<br/>Others referred to desired health outcomes</p> <p>"Best bits" of the workshop (mentioned most frequently): 1. information on diabetes; 2. the atmosphere of the workshop; 3. Receiving personal data on</p> |

## Supplementary file 6. Implementation data\_27.05.21

|                       |                                                        |                                                                                                                                                                                                                                                                                                                                                                                                                            |                                                                                                                                                                                                                                                                                                                                                  |                                                                                                                                                                                                                                                                                                                                                                                     |
|-----------------------|--------------------------------------------------------|----------------------------------------------------------------------------------------------------------------------------------------------------------------------------------------------------------------------------------------------------------------------------------------------------------------------------------------------------------------------------------------------------------------------------|--------------------------------------------------------------------------------------------------------------------------------------------------------------------------------------------------------------------------------------------------------------------------------------------------------------------------------------------------|-------------------------------------------------------------------------------------------------------------------------------------------------------------------------------------------------------------------------------------------------------------------------------------------------------------------------------------------------------------------------------------|
|                       |                                                        |                                                                                                                                                                                                                                                                                                                                                                                                                            |                                                                                                                                                                                                                                                                                                                                                  | sitting levels and health.<br><br>Behaviour change strategies attempted as reported by participants:<br>18 strategies mentioned to sit less and 8 strategies to move more.                                                                                                                                                                                                          |
| <b>Blunt (2018)</b>   | Only qualitative data reported                         | <b>*How recruited participants heard about the study:</b><br>51 (45%) from posters or handouts;<br>28 (25%) received an email from the study site advertising the project;<br>15 (13%) from an in-person study recruiter;<br>12 (11%) referred by their health care provider (HCP) and/or HCP team;<br>6 (5%) by word of mouth;<br>1 (1%) other unspecified methods<br>Five did not specify how they heard about the study | <b>*6 months:</b><br>I: n= 44 (74.6%)<br>C: n= 46 (78.0%)<br><br>3.4% (I: n= 2) Did not attend any session<br>6.8% (I: n= 5, C: n= 3) Personal/health reasons<br>3.4% (I: n= 3, C: n= 1) Time commitment<br>5.9% (I: n= 2, C: n= 5) No longer interested<br><br><b>*12 months:</b><br>I: n= 37 (63%)<br><br><b>*18 months:</b><br>I: n= 35 (59%) | <b>*Attendance:</b><br>5% attended no sessions;<br>17% attended 1 session;<br>10% attended 2 sessions;<br>20% attended 3 sessions;<br>48% attended all 4 sessions.<br>Across all sites, 40 participants (68%) were classified as programme completers. Among participants who completed the intervention programme, 30% attended 3 in-person sessions, 70% attended all 4 sessions. |
| <b>Eiramli (2017)</b> | Not reported                                           | 320 participants invited:<br>106 (33.1%) did not respond;<br>122 (38.1%) ineligible;<br>92 (28.8%) assessed for eligibility;<br>76 (23.8%) randomised                                                                                                                                                                                                                                                                      | <b>3 months:</b><br>I: n= 36 (92.3%)<br>C: n= 26 (70.3%)<br><br><b>6 months:</b><br>I: n= 37 (94.9%)<br>C: n= 22 (59.5%)                                                                                                                                                                                                                         | <b>Intervention attendance:</b><br>26 (66.7%) participants attended all 8 education sessions (6 sessions and 2 booster sessions)<br>28 (71.8%) attended 6 sessions<br>71.8 % attended the first booster session<br>76.9% attended the second booster session<br><br><b>Control group attendance:</b><br>21 (56.8%) participants attended the single group education session         |
| <b>Harris (2018)</b>  | Nurse session attendance and session content delivered | 11,015 people invited to participate;<br>6,399 did not respond;                                                                                                                                                                                                                                                                                                                                                            | <b>3 months:</b><br>Postal: n= 335 (98.8%)                                                                                                                                                                                                                                                                                                       | <b>Diary returned:</b><br>Postal: 268/339 (79%)                                                                                                                                                                                                                                                                                                                                     |

## Supplementary file 6. Implementation data\_27.05.21

|                         |                                                                                                                                                                                                                                                                                                                                                                                              |                                                                                                                                                                                                                                                                                                                                                                                                      |                                                                                                                                                                                                                                                                                                                                                                                                                                           |                                                                                                                                                                                                                                                                                                                                                          |
|-------------------------|----------------------------------------------------------------------------------------------------------------------------------------------------------------------------------------------------------------------------------------------------------------------------------------------------------------------------------------------------------------------------------------------|------------------------------------------------------------------------------------------------------------------------------------------------------------------------------------------------------------------------------------------------------------------------------------------------------------------------------------------------------------------------------------------------------|-------------------------------------------------------------------------------------------------------------------------------------------------------------------------------------------------------------------------------------------------------------------------------------------------------------------------------------------------------------------------------------------------------------------------------------------|----------------------------------------------------------------------------------------------------------------------------------------------------------------------------------------------------------------------------------------------------------------------------------------------------------------------------------------------------------|
|                         | <p>recorded by the nurses after each session.</p> <p>Fidelity to content delivered was high in all sessions; the mean number of items delivered in session one was 11 (range 10–11); six (range 5–6) in sessions 2 and 3.</p> <p>Duration of sessions reported by nurses and measured from records were not very far from the recommendation (<math>\pm 30\%</math> difference maximum).</p> | <p>548 were excluded as a result of self-reported PA guideline achievement; 1,023/10,467 (10%) were randomised.</p>                                                                                                                                                                                                                                                                                  | <p>Nurse: n= 335 (96.8%)<br/>C: n= 335 (99.1%)</p> <p>12 months:<br/>Postal: n= 319 (94.1%)<br/>Nurse: n= 317 (91.6%)<br/>C: n= 329 (97.3%)</p> <p>4.3% (Postal: n=15/339, Nurse: n=25/346, C: n=4/338) Withdrawn<br/>1.4% (Postal: n=5/339, Nurse: n=4/346, C: n=5/338) Not able to be contacted</p>                                                                                                                                     | <p>Nurse: 281/346 (81%)</p> <p>Pedometer use (every day or most days) during 12-week intervention:<br/>Postal: 238/294 (81%)<br/>Nurse: 269/303 (89%)</p> <p>Attending nurse sessions:<br/>255/346 (74%) attended all three sessions.<br/>258/263 (98%) attended session 3, and reported still using the pedometer and diary every day or sometimes.</p> |
| <b>Lakerveld (2012)</b> | Only qualitative data reported                                                                                                                                                                                                                                                                                                                                                               | <p>8,193 people of 12 general practices were invited according the age (30-50 years) and absence of DM or CVD.</p> <p>2,401 (29.3%) responded positively;<br/>1,186 (14.5%) declined;<br/>921 (11.2%) of those who accepted invitation met the waist circumference inclusion criterion;<br/>772 (9.4%) attended screening at clinic and consented;<br/>622 (7.6%) fully eligible and randomised.</p> | <p>End of intervention (6 months):<br/>I: n= 267 (85.0%)<br/>C: n= 269 (87.3%)</p> <p>12 months:<br/>I: n= 249 (79.3%)<br/>C: n= 253 (82.1%)</p> <p>24 months:<br/>I: n= 236 (75.2%)<br/>C: n= 244 (79.2%)</p> <p>Reasons for loss to follow-up:<br/>15.1% (I: n=42/308, C: n=52/314) Unable to attend<br/>3.7% (I: n=9/308, C: n=14/314) Withdrew consent<br/>1.1% (I: n=5/308, C: n=2/314) Became pregnant<br/>1.3% (IG n=5/308, C:</p> | <p>*207 (66%) participants received at least 1 face-to-face session, 78% of them were content with the sessions.</p> <p>The median number of attended sessions was 2 (out of a max of 6).</p>                                                                                                                                                            |

## Supplementary file 6. Implementation data\_27.05.21

|                            |                                |                                                                                                                                                                                                                                                                                                                                                                                                                                                |                                                                                                                                                                                                                                      |                                                                                                                                                                                                                                                                                                                                                                                                                                                                                                                                                                                           |
|----------------------------|--------------------------------|------------------------------------------------------------------------------------------------------------------------------------------------------------------------------------------------------------------------------------------------------------------------------------------------------------------------------------------------------------------------------------------------------------------------------------------------|--------------------------------------------------------------------------------------------------------------------------------------------------------------------------------------------------------------------------------------|-------------------------------------------------------------------------------------------------------------------------------------------------------------------------------------------------------------------------------------------------------------------------------------------------------------------------------------------------------------------------------------------------------------------------------------------------------------------------------------------------------------------------------------------------------------------------------------------|
|                            |                                |                                                                                                                                                                                                                                                                                                                                                                                                                                                | n=3/314) Unable to contact<br>0.2% (I: n=1/308, C:<br>n=0/314) Died<br>1.4% (I: n=2/308, C:<br>n=7/314) Diagnosed type 2<br>DM                                                                                                       |                                                                                                                                                                                                                                                                                                                                                                                                                                                                                                                                                                                           |
| <b>Lane<br/>(2010)</b>     | Not reported                   | 11,205 women registered for the Women's<br>Mini Marathon completed a survey about<br>their PA habits.<br><br>Consented respondents were followed up 2<br>months and 6 months afterwards<br>respectively:<br>2,020 of them provided records of PA<br>changes at both follow-ups;<br>414 of them were identified as having<br>relapsed to insufficient levels of PA and<br>invited to participate in the trial;<br>176 consented to participate. | Follow-up response rate<br>(end of trial at 6 Weeks):<br>I: n= 55 (65%)<br>C: n= 57 (63%)                                                                                                                                            | 76% of Intervention group participants<br>responded at 3 Weeks:<br>97% received the booklet(s)<br>90% found the booklet(s) useful<br>50% reported increase in PA levels<br>28.5% felt greater levels of motivation<br>which led to PA increase<br>16% felt they had more knowledge on<br>being active which led to PA increase<br>5% attributed the PA increase to training<br>for the Mini Marathon for the following<br>year<br><br>At end of trial (6 Weeks), receipt and use<br>of materials provided:<br>95% of intervention group participants<br>80% of control group participants |
| <b>Matson<br/>(2018)</b>   | Not reported                   | Not reported                                                                                                                                                                                                                                                                                                                                                                                                                                   | *I: n= 29 (100%)<br>*C: n= 25 (80.6%)                                                                                                                                                                                                | Only qualitative data reported                                                                                                                                                                                                                                                                                                                                                                                                                                                                                                                                                            |
| <b>Matthews<br/>(2016)</b> | Only qualitative data reported | Sample was deemed representative of<br>adults with intellectual disabilities: 91% (n<br>= 93) had mild or moderate intellectual<br>disability.                                                                                                                                                                                                                                                                                                 | *End of intervention (12<br>weeks):<br>I: n= 45 (83.3%)<br>C: n= 43 (89.6%)<br><br>*24 weeks:<br>I: n= 42 (77.8%)<br>C: n= 40 (83.3%)<br><br>Reasons for loss to follow-<br>up:<br>32.4% (I: n=20/54, C:<br>n=13/48) Did not want to | *54 participants were assigned to<br>intervention, and received the<br>intervention.<br><br>*71% took part in all 3 planned face-to-<br>face physical activity consultations.<br><br>*26% took part in 2 consultations<br>*3% took part in 1 consultation                                                                                                                                                                                                                                                                                                                                 |

## Supplementary file 6. Implementation data\_27.05.21

|                                            |                                                                                                                                                                                   |                                                                                                                                                                                                                                                                                                                                                                    |                                                                                                                                                                                                                                                                                                                                                                                                                                                                                                                   |                                                                                                                                                                                                                                                                                                                                                                                                                                                                                                                                                                                                                                                                                                                                                                                            |
|--------------------------------------------|-----------------------------------------------------------------------------------------------------------------------------------------------------------------------------------|--------------------------------------------------------------------------------------------------------------------------------------------------------------------------------------------------------------------------------------------------------------------------------------------------------------------------------------------------------------------|-------------------------------------------------------------------------------------------------------------------------------------------------------------------------------------------------------------------------------------------------------------------------------------------------------------------------------------------------------------------------------------------------------------------------------------------------------------------------------------------------------------------|--------------------------------------------------------------------------------------------------------------------------------------------------------------------------------------------------------------------------------------------------------------------------------------------------------------------------------------------------------------------------------------------------------------------------------------------------------------------------------------------------------------------------------------------------------------------------------------------------------------------------------------------------------------------------------------------------------------------------------------------------------------------------------------------|
|                                            |                                                                                                                                                                                   |                                                                                                                                                                                                                                                                                                                                                                    | continue<br>1% (I: n=1/54) Ill-health                                                                                                                                                                                                                                                                                                                                                                                                                                                                             |                                                                                                                                                                                                                                                                                                                                                                                                                                                                                                                                                                                                                                                                                                                                                                                            |
| <b>Poston (2013)</b>                       | Goals were set at all group sessions, of which 88% were considered SMART by HTs according to their diaries.                                                                       | According to information from the Health and Social Care Information Centre (2013), approximately 1:5 pregnant women would be eligible for inclusion.<br><br>473/656 (72%) eligible people declined to participate (43.0% of those who declined were in the lowest quintile for Index of deprivation indicating the most severe deprivation);<br>38% participated. | End of intervention:<br>I: n= 79 (84.0%)<br>C: n= 75 (84.3%)                                                                                                                                                                                                                                                                                                                                                                                                                                                      | 82/94 (88%) attended at least one group session, and 60 (64%) attended 4 or more.<br><br>42 women (45%) received material from all eight sessions, 6 by full attendance (6%) and 36 when partly/wholly covered by subsequent phone contact.<br><br>Mean of 6.1 (SD 2.6) sessions were attended or partly/wholly covered for the intervention group.                                                                                                                                                                                                                                                                                                                                                                                                                                        |
| <b>School of Public Health, HKU (2017)</b> | Fidelity checks were conducted for every session of the programmes, which ensured the quality of the intervention and the implementation of the key elements in the intervention. | 8 participating Integrated Family Service Centres to recruit around 600 eligible parents.<br><br>728 (121.3% of target) randomised.                                                                                                                                                                                                                                | Trial Core session (baseline):<br>I: n= 357 (92.5%)<br>C: n= 316 (92.4%)<br><br>3 months:<br>I: n= 335 (86.8%)<br>C: n= 306 (89.5%)<br><br>6 months:<br>I: n= 328 (85.0%)<br>C: n= 298 (87.1%)<br><br>End of intervention -12 months:<br>I: n= 309 (80.1%)<br>C: n= 284 (83.0%)<br><br>Reasons for absence from sessions included occupied with other activities, took care of family, illness, could not be contacted, and abroad; the exact number of participants dropped out for each of these reasons cannot | Physical activity group: (386 randomised)<br>357 (92.5%) attended core (1st) session<br>355 (92.0%) attended booster session at 3 months<br>313 (81.1%) attended tea gathering at 6 months<br>281 (72.8%) attended Family Holistic Health session at 1 year.<br><br>Healthy diet group: (342 randomised)<br>316 (92.4%) attended core (1st) session<br>306 (89.5%) attended booster session at 3 months<br>292 (85.4%) attended tea gathering at 6 months<br>268 (78.4%) attended Family Holistic Health session at 1 year.<br><br>Participant's feedback at end of Physical activity programme (on a scale of 0-10, 10 is best) (Mean (SD)):<br>9.0 (1.2) Quality of intervention content<br>9.0 (1.2) Level of utility of the intervention<br><br>100% participants would recommend this |

## Supplementary file 6. Implementation data\_27.05.21

|                         |              |                                                                                                                                                                                                                                                                                                                                                                                                                                                                                                                                                                                                                                                                                                                                                                                                                         |                                                                                                                                                                                                                                                               |                                                                                                                                                                                                                                                                                                                                                                                                                                                                                                         |
|-------------------------|--------------|-------------------------------------------------------------------------------------------------------------------------------------------------------------------------------------------------------------------------------------------------------------------------------------------------------------------------------------------------------------------------------------------------------------------------------------------------------------------------------------------------------------------------------------------------------------------------------------------------------------------------------------------------------------------------------------------------------------------------------------------------------------------------------------------------------------------------|---------------------------------------------------------------------------------------------------------------------------------------------------------------------------------------------------------------------------------------------------------------|---------------------------------------------------------------------------------------------------------------------------------------------------------------------------------------------------------------------------------------------------------------------------------------------------------------------------------------------------------------------------------------------------------------------------------------------------------------------------------------------------------|
|                         |              |                                                                                                                                                                                                                                                                                                                                                                                                                                                                                                                                                                                                                                                                                                                                                                                                                         | be ascertained.                                                                                                                                                                                                                                               | intervention programme to their friends and families                                                                                                                                                                                                                                                                                                                                                                                                                                                    |
| <b>Spittaels (2007)</b> | Not reported | <p>8,000 employees targeted via 6 worksites using email messages, posters and internal newsletters;</p> <p>570 (7.1%) responded positively;</p> <p>562 (7.0%) returned the baseline questionnaire with the informed consent, and then randomised.</p> <p>~65% of participants met the minimal recommendations for physical activity at baseline despite explicit recruitment of inactive participants</p> <p>31% participants were female, males comprising the majority of employees in the two biggest worksites for recruitment</p> <p>Male participants already had high baseline physical activity scores compared to the general male population (72% vs. 57% meeting the recommendations), whereas female participants were more representative of the population (47% vs. 48% meeting the recommendations).</p> | <p>End of intervention:</p> <p>Tailored advice+emails: n= 116 (66.7%)</p> <p>Tailored advice: n= 122 (69.7%)</p> <p>C: n= 141 (79.7%)</p>                                                                                                                     | <p>Recalled having received the tailored advice (% participants):</p> <p>97% Tailored advice+emails group</p> <p>94% Tailored advice group</p> <p>53% Control group</p> <p>Tailored advice+emails group satisfaction (% participants):</p> <p>92% Received at least 3 of the 5 reinforcement emails</p> <p>77% Read them completely</p> <p>87% Satisfied by number of emails</p> <p>86% Satisfied by frequency of emails</p> <p>45% Felt emails were useful</p> <p>33% Reported behavioural changes</p> |
| <b>Stathi (2019)</b>    | Not reported | <p>2,000 mailed invitations were delivered in the target areas resulting in 230 responses from potential participants and activators (response rate 11.5%).</p> <p>ACE participants: 154 (7.7%) requests for information packs. 65 (3.3%) people returned reply forms. 40 (2.0%) recruited.</p> <p>Activators: 76 (3.8%) requests for information packs. 15 (0.8%) recruited after completing the training.</p>                                                                                                                                                                                                                                                                                                                                                                                                         | <p>End of intervention:</p> <p>Activator: n= 15 (100.0%)</p> <p>Participants:</p> <p>I: n= 19 (86.4%)</p> <p>C: n= 13 (76.5%)</p> <p>Reasons for dropping out prior to final measures:</p> <p>7.7% (3/39) Ill-health</p> <p>5.1% (2/39) Carer commitments</p> | <p>All participants who completed the intervention engaged with their activator at least 7 times as planned.</p> <p>Of the 3 participants who dropped out: 2 met their activator less than 5 times but were contacted regularly by phone.</p>                                                                                                                                                                                                                                                           |

Supplementary file 6. Implementation data\_27.05.21

|                 |              |                                                                                                                                  |                                                                    |                                                                                                                                       |
|-----------------|--------------|----------------------------------------------------------------------------------------------------------------------------------|--------------------------------------------------------------------|---------------------------------------------------------------------------------------------------------------------------------------|
|                 |              |                                                                                                                                  | 2.6% (1/39) Lack of time<br>2.6% (1/39) Moving to a different city |                                                                                                                                       |
| Williams (2019) | Not reported | 215 eligible service users contacted by letter and phone;<br>71 not interested;<br>104 not contactable;<br>40 (18.6%) recruited. | I: n= 16 (80.0%)<br>C: n= 17 (85.0%)                               | 13 (65%) received intervention:<br>5 did not engage with intervention;<br>2 did not engage with intervention after education session. |

Keys: \* = Data from associated publications; ACE = Active, Connected, Engaged intervention; BCG = Behaviour change group; BMI = Body Mass Index; C = Control group; CVD = Cardiovascular disease; DM = Diabetes Mellitus; FU = Follow-up; GP = General practitioner; HC = Health centre; HCP = Health care provider; HT = Health trainer; I = Intervention group; LSA = Lifestyle advisor; MVPA = Moderate-to-vigorous physical activity; n = number of persons; PA = Physical activity; PT = Physiotherapist; SD = Standard deviation; SMART = Specific, Measurable, Achievable, Relevant, and Time Specific; TEG = Traditional exercise group; vs = versus
